# Supplementary material for: Double Rabi splitting in methylene blue dye-Ag nanocavity
Source: Nanophotonics. 2022 Jan 4;11(3):603–11. doi: 10.1515/nanoph-2021-0697 (PMC11501508; doi:10.1515/nanoph-2021-0697)
Supplement: Supplementary file 1 — Supplementary Material [file j_nanoph-2021-0697_suppl.docx]

**Double Rabi Splitting in** **Methylene Blue Dye-Ag Nanocavity**

Xiaobo Han1, Fang Li1,*, Zhicong He1, Yahui Liu1, Huatian Hu1, Kai Wang2,*, and Peixiang Lu1,2,3

1Hubei Key Laboratory of Optical Information and Pattern Recognition, Wuhan Institute of Technology, Wuhan 430205, China

2Wuhan National Laboratory for Optoelectronics and School of Physics, Huazhong University of Science and Technology, Wuhan 430074, China

3Guangdong Intelligent Robotics Institute, Dongguan 523808, China

*Corresponding authors: lifang@wit.edu.cn (FL), kale_wong@hust.edu.cn (KW)


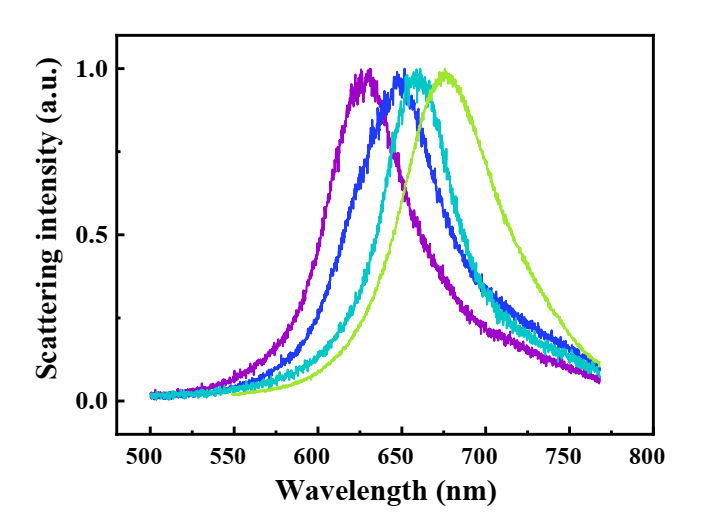


**Figure S1.** Scattering spectra of Ag nanocavities by varying the size of nanocubes (65-95 nm).


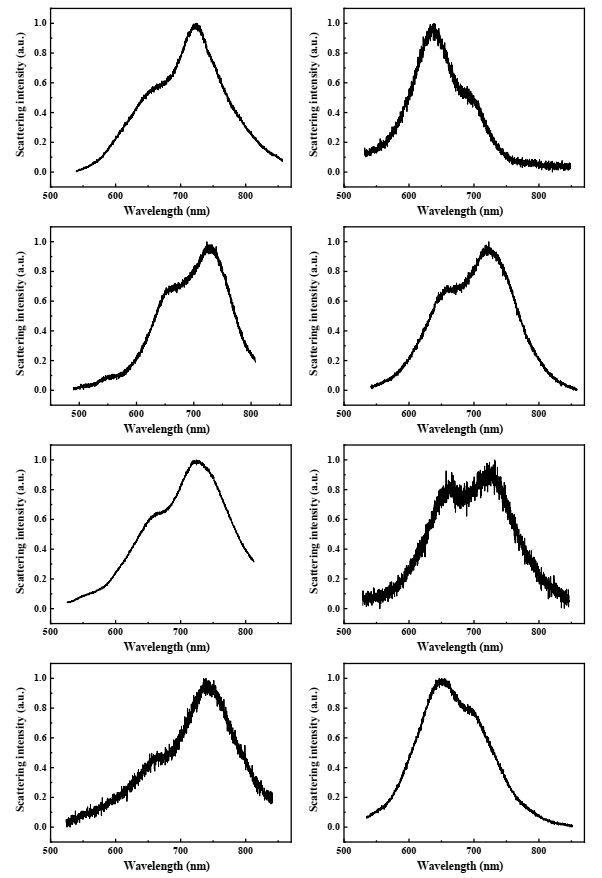


**Figure S2.** Representative scattering spectra of hybrids at a low dye concentration.


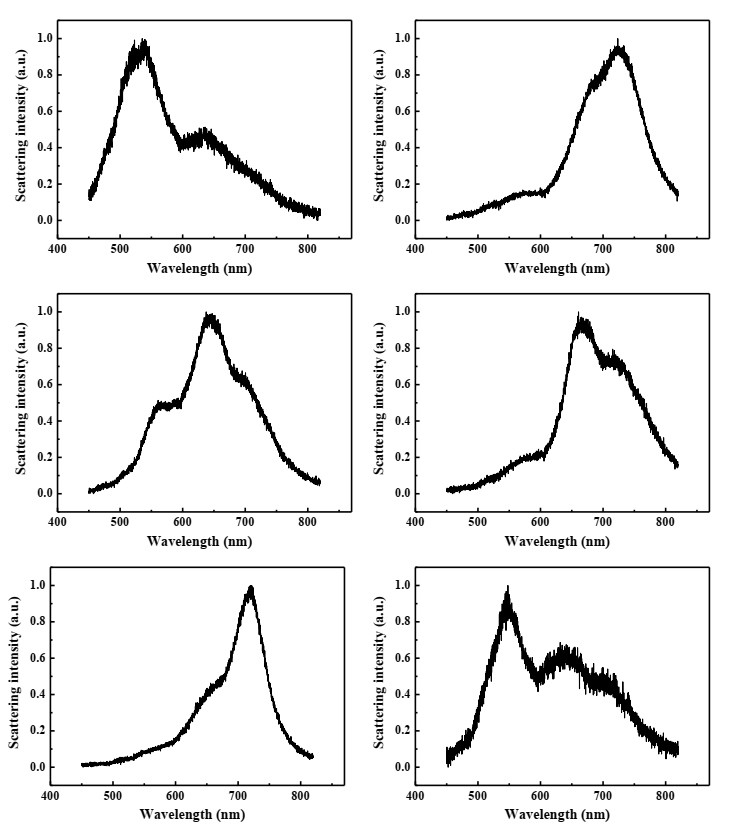


**Figure S3.** Representative scattering spectra of hybrids at a high dye concentration.
